# Supplementary material for: Experimental Infection of North American Sheep with Ehrlichia ruminantium
Source: MDPI journal article supplement (doi:10.3390/pathogens10040451), 2021-04-09

Figure S1 (White Dorper breed sheep; 6-month-old)

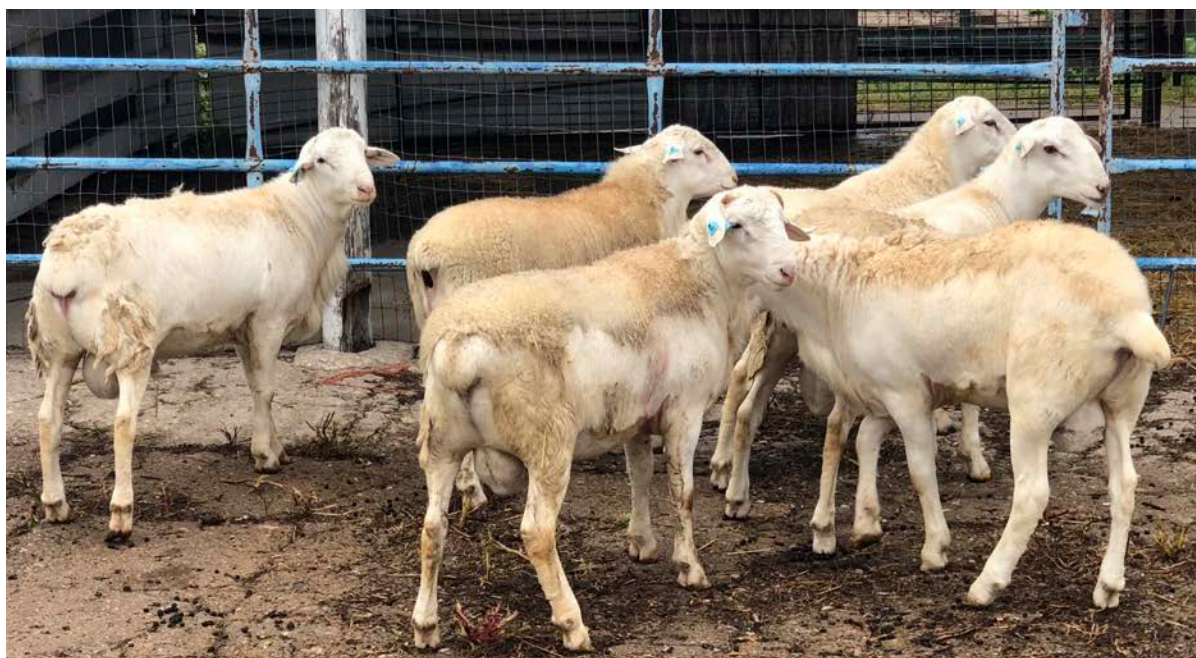

Figure S2 (*E. ruminantium* *in vitro* cultured strains)

Crystal Springs

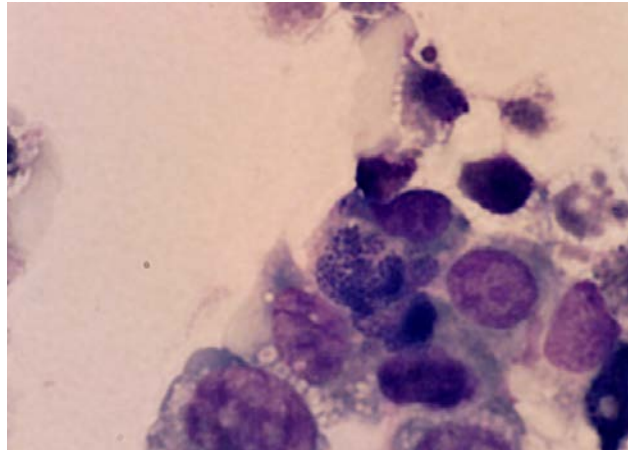

Highway

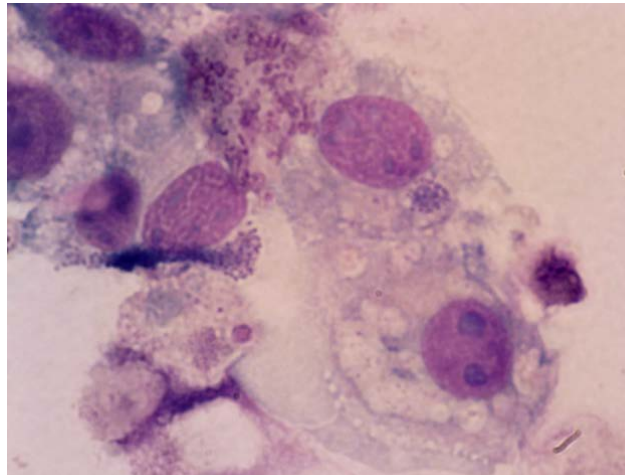

Mbizi

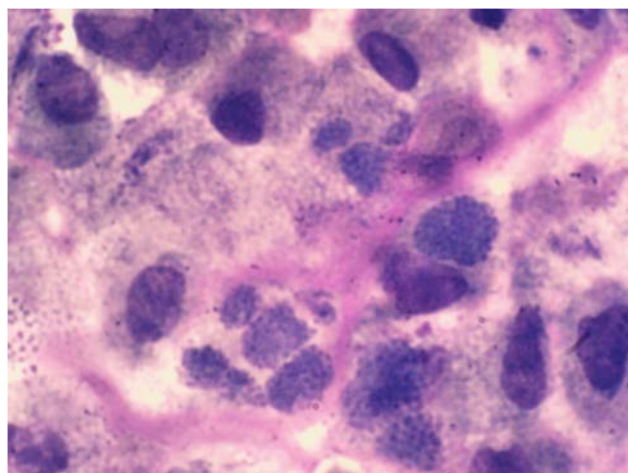

Figure S3 (Katahdin X Romanov cross breed; 6 months of age)

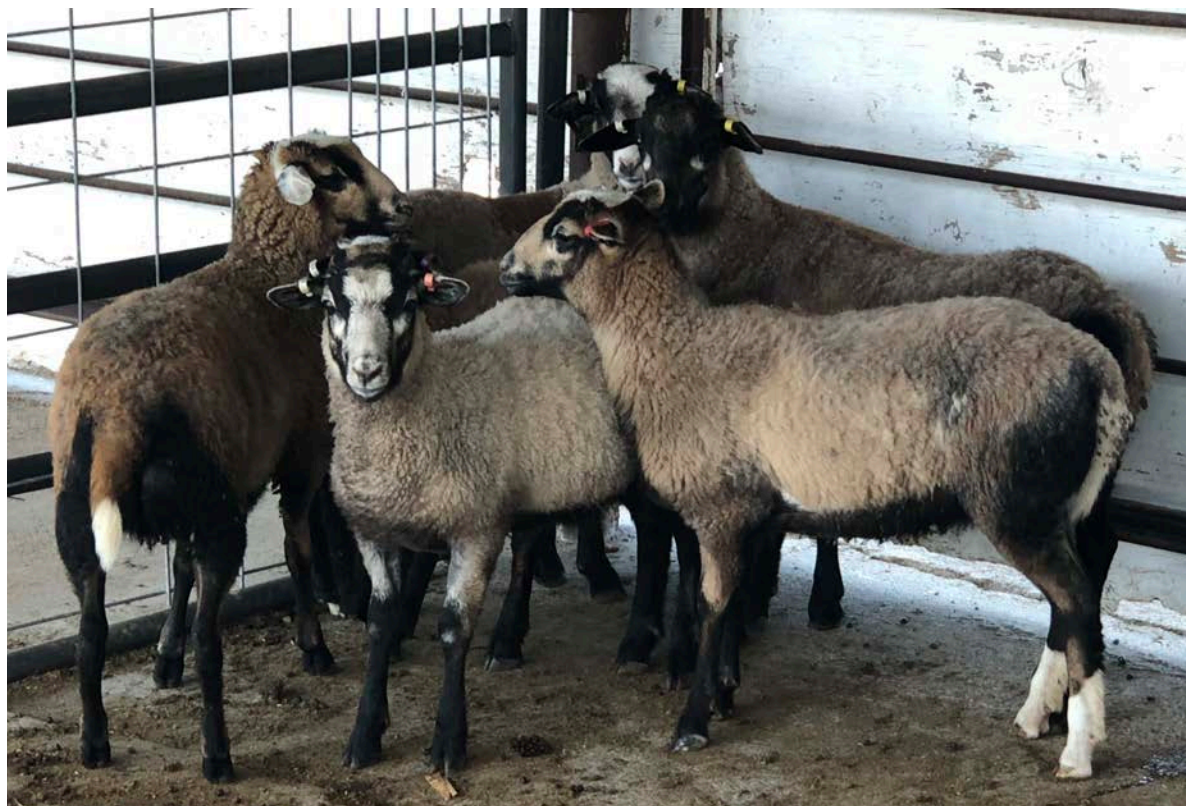

Supplement: s1 [file s1]
